# Supplementary material for: Quantifying the effects of biopsy fixation and staining panel design on automatic instance segmentation of immune cells in human lupus nephritis
Source: PubMed Central journal article supplement (PMC7791891; doi:10.1117/1.jbo.26.2.022910), 2021-01-08
Supplement: JBO_026_022910_SD001.pdf [file JBO_026_022910_SD001.pdf]

## Supplementary Information

### Antibody staining

Table S1 shows the details for selected antibodies for both fresh frozen and FFPE samples. A single panel was used on fresh frozen samples. In this work, two FFPE datasets were used, each with different staining. Samples in the FFPE-DS dataset were stained for T cells and one dendritic cell population: either myeloid dendritic cells (mDCs) or plasmacytoid dendritic cells (pDCs). The mDC panel for the FFPE-DS dataset consisted of: CD3, CD4, BDCA1, and CD11c. The pDC panel for the FFPE-DS dataset consisted of: CD3, CD4, BDCA2, and CD123. Samples in the FFPE-SS dataset were stained for T cells, B cells, pDCs, and mDCs. The FFPE-SS panel consisted of: CD3, CD4, CD20, BDCA2, and CD11c.

**Table S1.** Details on selected antibodies used for staining of fresh frozen and FFPE samples.

| <b>Primary antibodies for fresh frozen sections</b> |                     |                 |                  |                 |
|-----------------------------------------------------|---------------------|-----------------|------------------|-----------------|
| <i>Antibody target</i>                              | <b>Clone</b>        | <b>Vendor</b>   | <b>Catalog #</b> | <b>Dilution</b> |
| <i>CD3</i>                                          | SP7                 | abcam           | ab16669          | 1:100           |
|                                                     | CD3-12              | AbD Serotec     | MCA1477F         | 1:50            |
| <i>CD4</i>                                          | YNB46.1.8           | abcam           | ab34276          | 1:100           |
| <i>CD303 (BDCA2)</i>                                | AC144               | Miltenyi Biotec | 130-090-510      | 1:10            |
| <i>CD11c</i>                                        | EP1347Y             | abcam           | ab52632          | 1:100           |
| <i>CD1c (BDCA1)</i>                                 | L161                | Beckman Coulter | IM0789           | 1:100           |
| <i>CD123</i>                                        | 6H6                 | eBioscience     | 14-1239-82       | 1:100           |
| <b>Primary antibodies for FFPE sections</b>         |                     |                 |                  |                 |
| <i>Antibody target</i>                              | <b>Clone</b>        | <b>Vendor</b>   | <b>Catalog #</b> | <b>Dilution</b> |
| <i>BDCA2</i>                                        | polyclonal goat IgG | R&D Systems     | AF1376           | 1:50            |
| <i>CD4</i>                                          | EPR6855             | abcam           | ab196147         | 1:100           |
| <i>CD3</i>                                          | CD3-12              | AbD Serotec     | MCA1477          | 1:100           |
| <i>CD1c (BDCA1)</i>                                 | L161                | Beckman Coulter | IM0789           | 1:100           |
| <i>CD123</i>                                        | 6H6                 | eBioscience     | 14-1239-82       | 1:100           |
| <i>CD11c</i>                                        | EP1347Y             | abcam           | ab52632          | 1:100           |
| <i>CD20</i>                                         | L26                 | Agilent         | M0755            | 1:100           |
